# Supplementary material for: Systematic Review and Meta-analysis of the Change in Ghrelin Levels After Roux-en-Y Gastric Bypass
Source: Springer Nature journal article supplement (doi:10.1007/s11695-018-03686-3), 2019-01-25
Supplement: MOESM2 [file 16420874]

| **Supplementary Table 2** Quality assessment of included cohort studies. | | | | | | | | | |
| --- | --- | --- | --- | --- | --- | --- | --- | --- | --- |
| Study | A | B | C | D | E | F | G | H | Total |
| Bose et al. [[35](#_ENREF_35)] | 1 | 1 | 1 | 1 | 1 | 1 | 1 | 1 | 8 |
| Bryant *et al.* [[29](#_ENREF_29)] | 1 | 0 | 1 | 1 | 0 | 1 | 1 | 1 | 6 |
| Carrasco *et al.* [[32](#_ENREF_32)] | 1 | 0 | 1 | 1 | 1 | 1 | 1 | 1 | 7 |
| Garcia-Fuentes *et al.* [[15](#_ENREF_15)] | 1 | 0 | 1 | 1 | 1 | 1 | 1 | 1 | 7 |
| Hansen *et al.*[[30](#_ENREF_30)] | 1 | 0 | 1 | 1 | 0 | 1 | 1 | 1 | 6 |
| Mancini *et al.* [[34](#_ENREF_34)] | 1 | 0 | 1 | 1 | 0 | 1 | 1 | 1 | 6 |
| Nosso *et al.* [[33](#_ENREF_33)] | 1 | 1 | 1 | 1 | 1 | 1 | 1 | 1 | 8 |
| O’Brien *et al.* [[28](#_ENREF_28)] | 1 | 0 | 1 | 1 | 1 | 1 | 1 | 1 | 7 |
| Olivan *et al.* [[27](#_ENREF_27)] | 1 | 1 | 1 | 1 | 1 | 1 | 1 | 1 | 8 |
| Pérez-Romero *et al.* [[16](#_ENREF_16)] | 1 | 0 | 1 | 1 | 1 | 1 | 1 | 1 | 7 |
| Terra *et al.* [[39](#_ENREF_39)] | 1 | 0 | 1 | 1 | 1 | 1 | 1 | 1 | 7 |
| van der Zwaal *et al.* [[31](#_ENREF_31)] | 1 | 0 | 1 | 1 | 1 | 1 | 1 | 1 | 7 |
| A: whether the patients included in the study really represented all people in the population who had undergone RYGB surgery; B: whether the non-exposed group was from the same population as the RYGB group; C: whether the RYGB had a confirmed surgical record; D: whether ghrelin levels had been known before RYGB; E: whether the study considered the comparability of RYGB and non-RYGB groups in design and statistical analysis; F: whether the results of the study had file records; G: whether the follow-up time for the population was sufficiently long; H: whether the follow-up in RYGB group was complete. | | | | | | | | | |
